# Supplementary material for: A Human-Immune-System (HIS) humanized mouse model (DRAGA: HLA-A2. HLA-DR4. Rag1 KO.IL-2Rγc KO. NOD) for COVID-19
Source: Research Square preprint supplement (doi:10.21203/rs.3.rs-225156/v1), 2021-03-10

**A Human-Immune-System (HIS) humanized mouse model (DRAGA: HLA-A2. HLA-DR4. Rag1 KO.IL-2Rc KO. NOD) for COVID-19**

Teodor-D. Brumeanu*1, Pooja Vir¥1, Ahmad Faisal Karim¥1,Swagata Kar3, Dalia Benetiene3, Megan Lok3, Jack Greenhouse3, Tammy Putmon-Taylor3, Christopher Kitajewski3, Kevin K. Chung1, Kathleen P. Pratt1, Sofia A. Casares*1,2

**1***Uniformed Services University of the Health Sciences, Department of Medicine, Division of Immunology, Bethesda, MD 20814, U.S.A.*

**2***Naval Medical Research Center/Walter Reed Army Institute of Research, Infectious Diseases Directorate, Silver Spring, MD 20910, U.S.A.*

**3***Bioqual Inc., Rockville, MD 20852, U.S.A.*

**Table S1. Human immune parameters of HIS-DRAGA mice**

|  |  |  | **Peripheral blood** | |  |  |  |
| --- | --- | --- | --- | --- | --- | --- | --- |
| **Mouse*** | **Gender** | **Time post-infusion with human stem cells** | **% human B cells (CD19+)** | **% human T cells**  **(CD3+)** | **SARS-CoV-2 challenge dose (pfu)** | **Euthanasia (days post-infection)** | **Cord blood HLA haplotype^** |
| M#1 | M | 21 weeks | 4.5 | 13.5 | 2.8x103 | 1(died) | A |
| F#1 | F | 21 weeks | 48.6 | 9.3 | 2.8x103 | 14 | A |
| F#2 | F | 21 weeks | 21 | 33.4 | 2.8x104 | 14 | A |
| F#3 | F | 16 weeks | 9.0 | 2.5 | 1x103 | 25 | B |
| F#4 | F | 16 weeks | 37.0 | 4.7 | 1x103 | 25 | B |
| F#5 | F | 16 weeks | 23.6 | 5.0 | 1x103 | 25 | B |
| F#6 | F | 16 weeks | 0.6 | 12.5 | 1x103 | 25 | B |
| F#7 | F | 30 weeks | 5.9 | 42.6 | 1x103 | 25 | A |
| F#8 | F | 24 weeks | 16.1 | 37.8 | 1x103 | 25 | C |
| F#9 | F | 16 weeks | 21.5 | 8.0 | 1x103 | 25 | B |
| F#10 | F | 24 weeks | 6.0 | 23.8 | 1x103 | 25 | C |
| M#2 | M | 30 weeks | 8.3 | 9.3 | 1x103 | 3 | A |
| M#3 | M | 16 weeks | 5.7 | 15.0 | 1x103 | 3 | B |
| M#4 | M | 16 weeks | 2.0 | 51.1 | 1x103 | 3 | B |
| F#11 | F | 16 weeks | 6.1 | 25.4 | 1x103 | 3 | B |
| F#12 | F | 24 weeks | 7.0 | 8.8 | 1x103 | 3 | C |
| F#13 | F | 24 weeks | 0.6 | 26.8 | 1x103 | 3 | C |
| a | M | 20 weeks | 18.9 | 28.3 | ---- | ---- | D |
| b | M | 20 weeks | 0.9 | 41.4 | ---- | ---- | D |
| c | F | 24 weeks | 52.5 | 17.5 | ---- | ---- | D |
| d | M | 24 weeks | 7.4 | 16.6 | ---- | ---- | D |
| e | M | 24 weeks | 1.0 | 22.1 | ---- | ---- | D |
| f | M | 24 weeks | 1.2 | 44.7 | ---- | ---- | D |
| g | M | 24 weeks | 17.6 | 38.3 | ---- | ---- | D |
| h | F | 20 weeks | 35.2 | 5.0 | ---- | ---- | E |
| i | M | 26 weeks | 4.9 | 26.1 | ---- | ---- | E |
| j | M | 26 weeks | 21.9 | 30.7 | ---- | ---- | E |

Lungs from uninfected mice a-j were pooled to assess human ACE2 mRNA and protein expression.

| ^A: A02:01/A24:02/B13:02/B44:02/DR01:01/DR04:01 |
| --- |
| ^B: A01:01/A02:01/B08:01/B15:01/DR03:01/DR04:01 |
| ^C: A02:01/A24:02/B44:02/B52:01/DR04:01/DR11:04 |
| ^D: A02:01/A02:01/B18:01/B44:02/DR04:01/DR11:04 |
| ^E: 02:01/A02:01/B08:01/B27:05/DR03:01/DR04:01 |


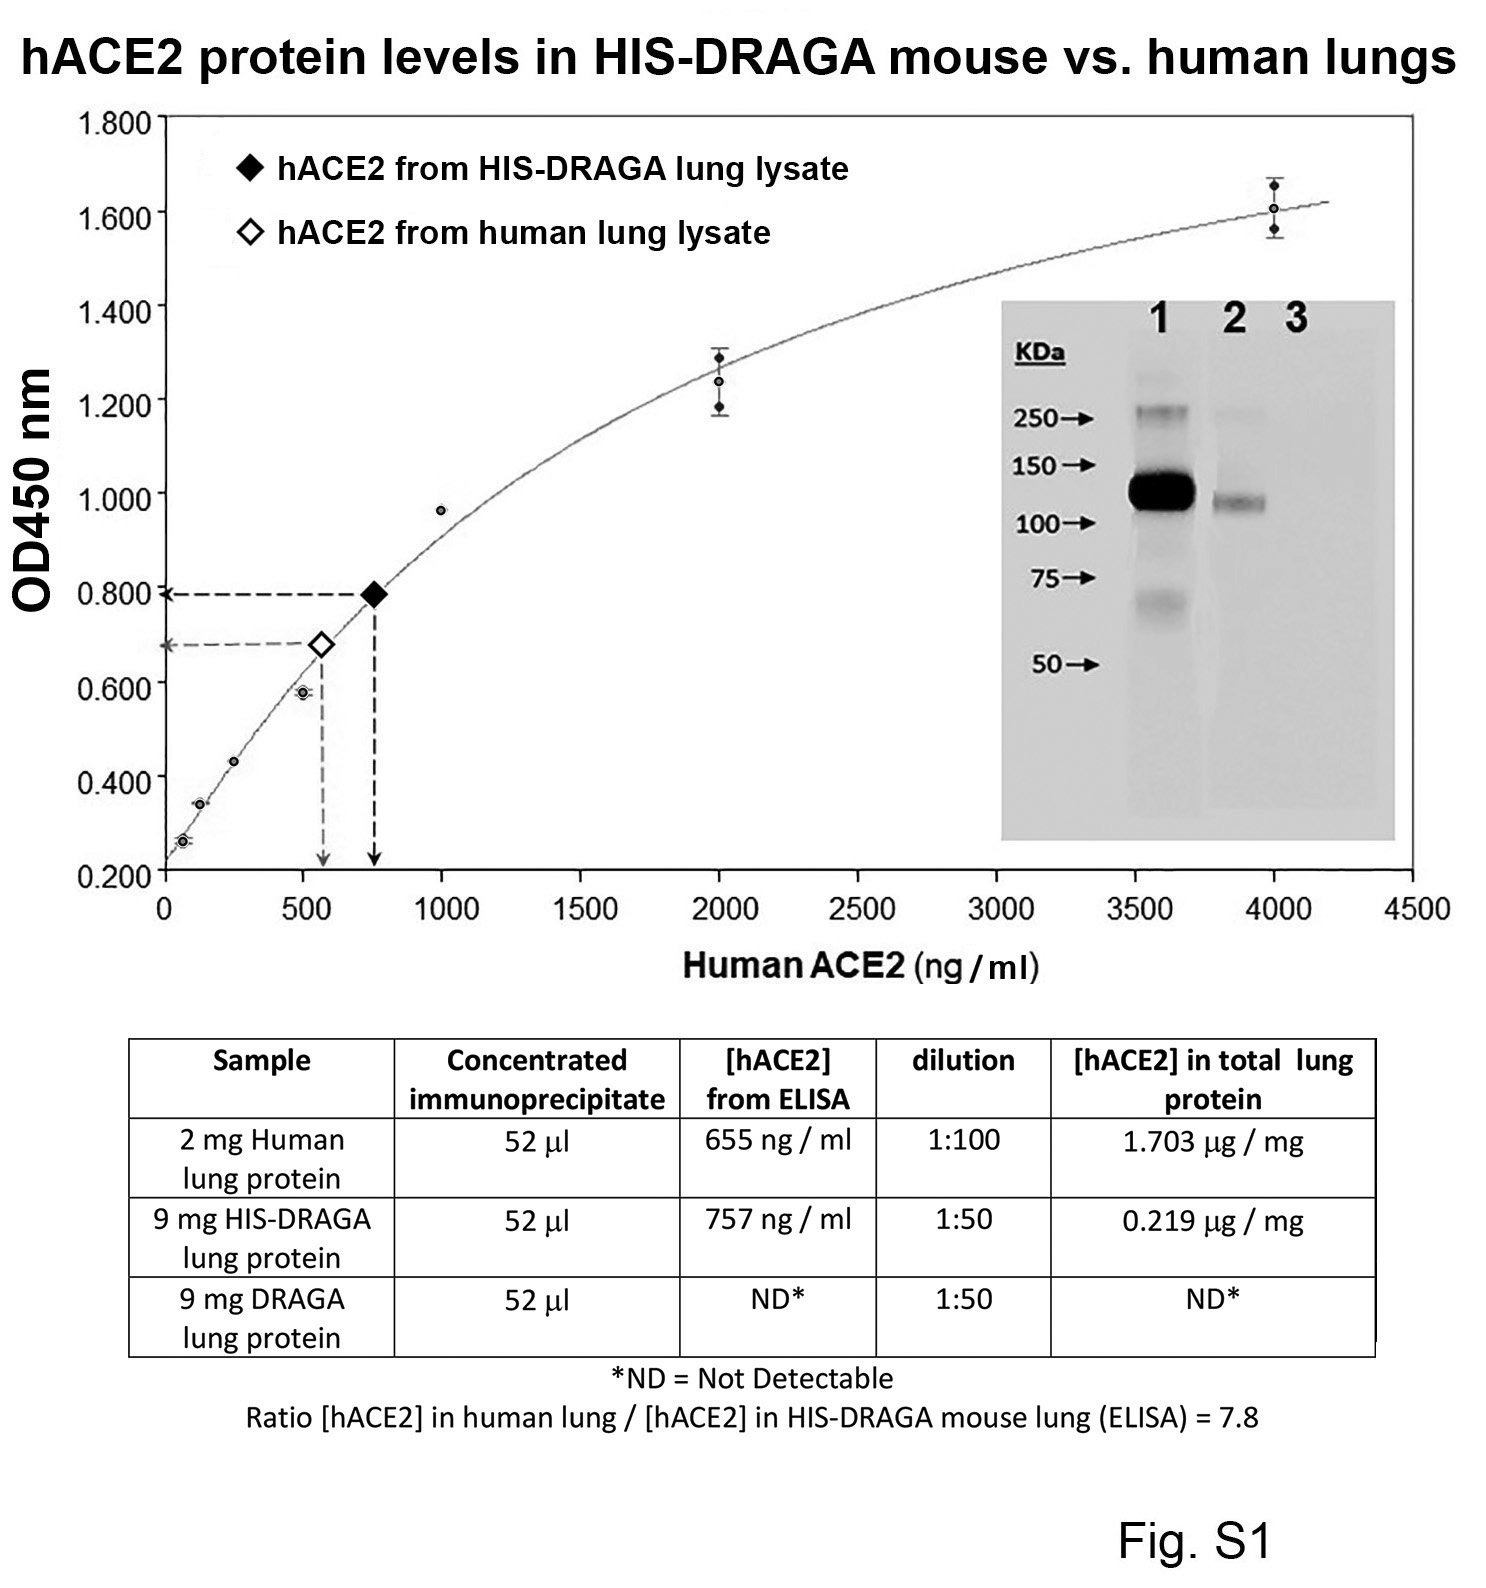


**Figure S1. Quantification of hACE2 protein in HIS-DRAGA lungs**. Human ACE2 levels in immunoprecipitates obtained from non-infected HIS-DRAGA and human lung lysates using S1(RBD)-mFc2a protein + rat anti-mouse IgG2a-magnetic beads were quantified by ELISA. Of note, the OD450nm values for protein immunoprecipitated from a pool of 10 non-infected, non-HIS-humanized DRAGA mouse lung lysates (negative control) fell below the limit of detection (OD450nm <0.05). ***Insert*** shows Western blot detection of hACE2 protein in the concentrated immunoprecipitates probed with a mouse monoclonal anti-human ACE2 IgG followed by goat anti-mouse IgG-HRP with ECL detection. *Lane 1*, human lung immunoprecipitate; *lane 2*, HIS-DRAGA mouse lungs immunoprecipitate; *lane 3*, DRAGA mouse lungs immunoprecipitate (note this sample did not contain detectable hACE2). Lower panel shows the experimental conditions for immunoprecipitation of hACE2, quantification by ELISA, and the ratio of hACE2 in human versus HIS-DRAGA mouse lung samples.


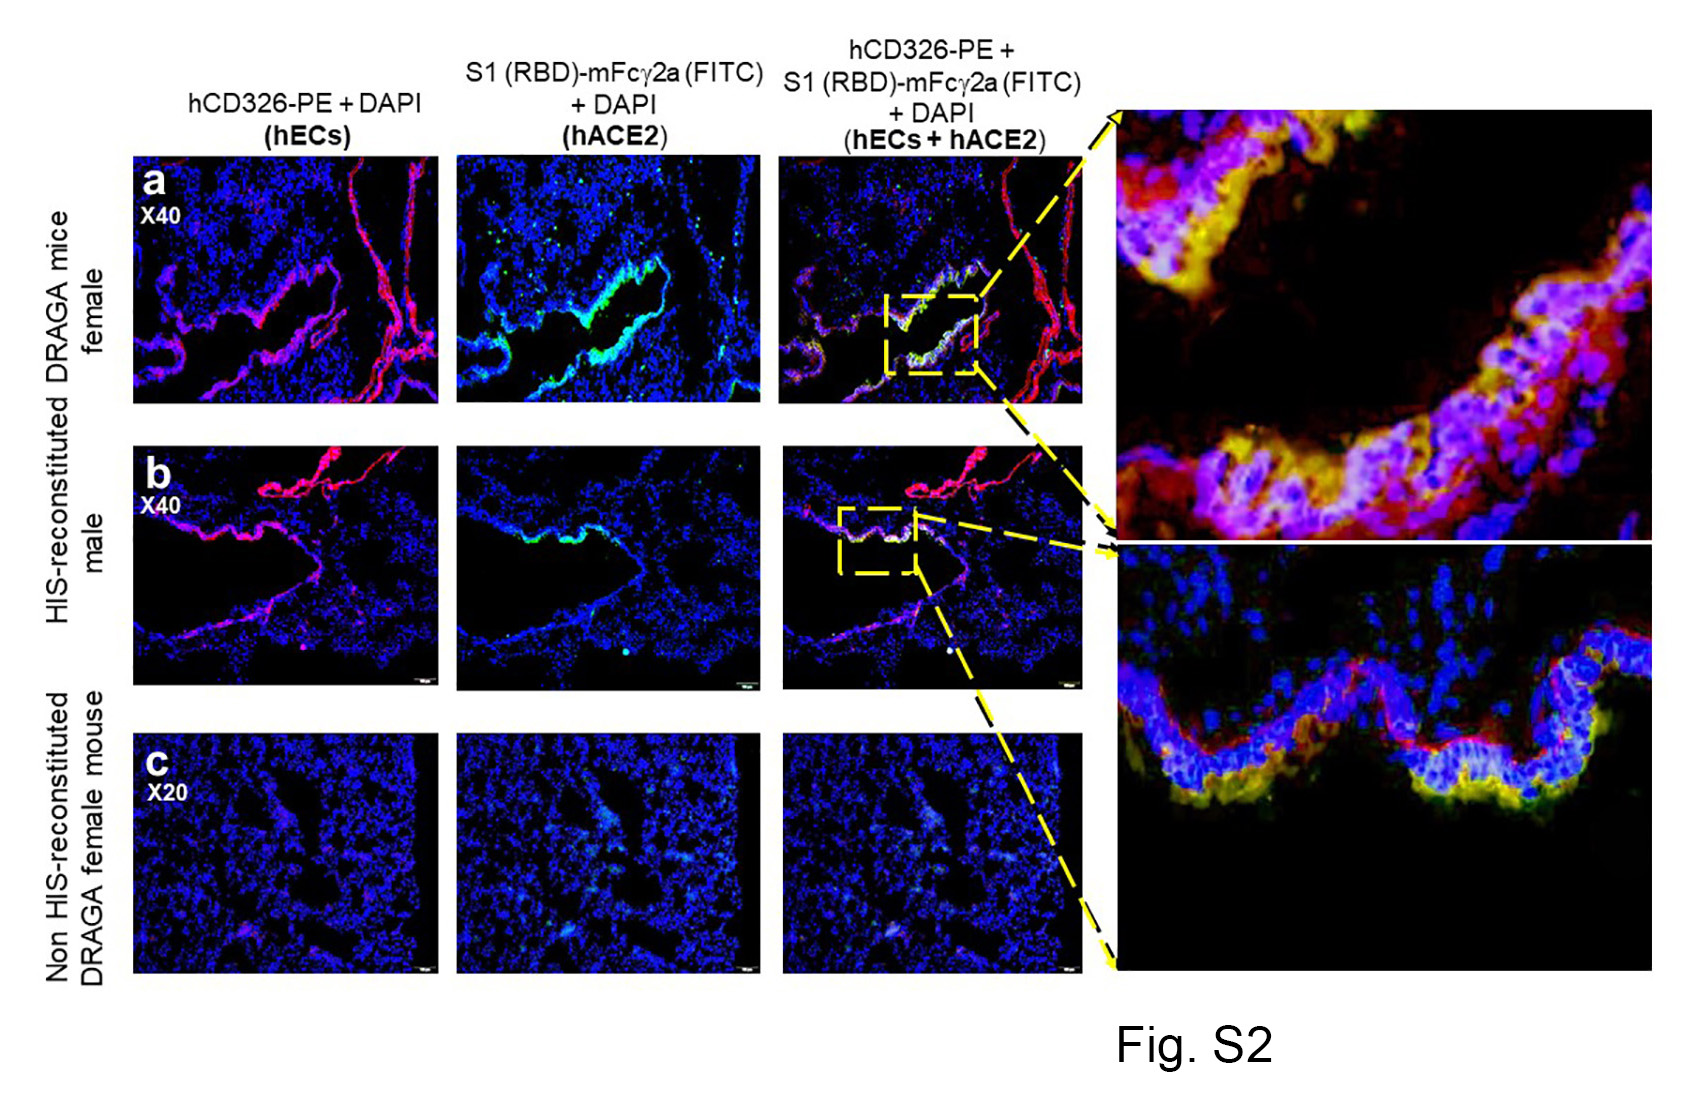


**Figure S2. Co-localization of hACE2 receptor with hCD326+ alveolar ECs in a non-infected HIS-DRAGA mouse. a**,**b.** Co-localization ofhACE2 with alveolar hCD326+ ECs (orange) revealed by co-staining of S1(RBD)-mFc2a protein + goat anti-mouse IgG-FITC (green) and anti-hCD326-PE (red) in representative HIS-DRAGA female and male mice. **c.** Lack of hCD326+ ECs and negligible binding of S1(RBD)-mFc2a protein to a representative lung section from a non-HIS-reconstituted DRAGA female mouse.


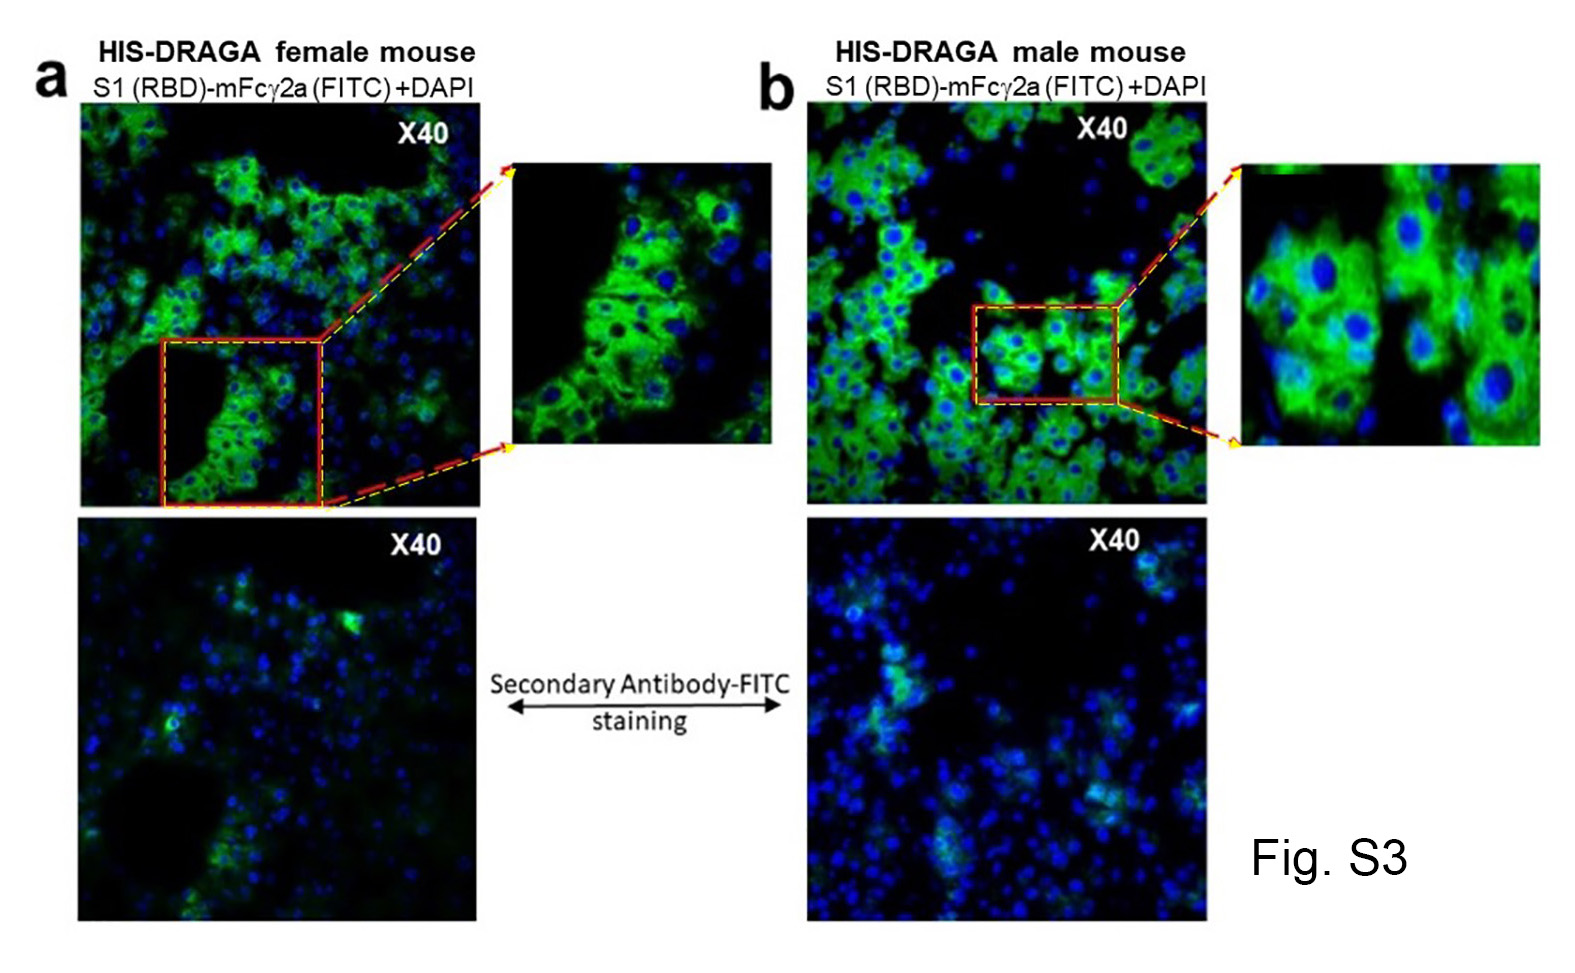


**Figure S3. Binding of SARS-CoV-2 S1(RBD) protein to the endothelium of liver cholangiocytes in non-infected HIS-DRAGA mice.** S1(RBD) binding tothe liver cholangiocytes from representative non-infected HIS-DRAGA female (*panel a)* and male *(panel b)* mice. Merged images and enlargements show binding of S1(RBD)-mFc2a revealed by a goat anti-mouse IgG-FITC conjugate (green) and nuclei (DAPI, blue). *Lower* panels,representative images showing minimal background binding of the goat anti-mouse IgG-FITC secondary antibody (green) and nuclei (DAPI, blue) in tissues from the same mice in panels a and b.


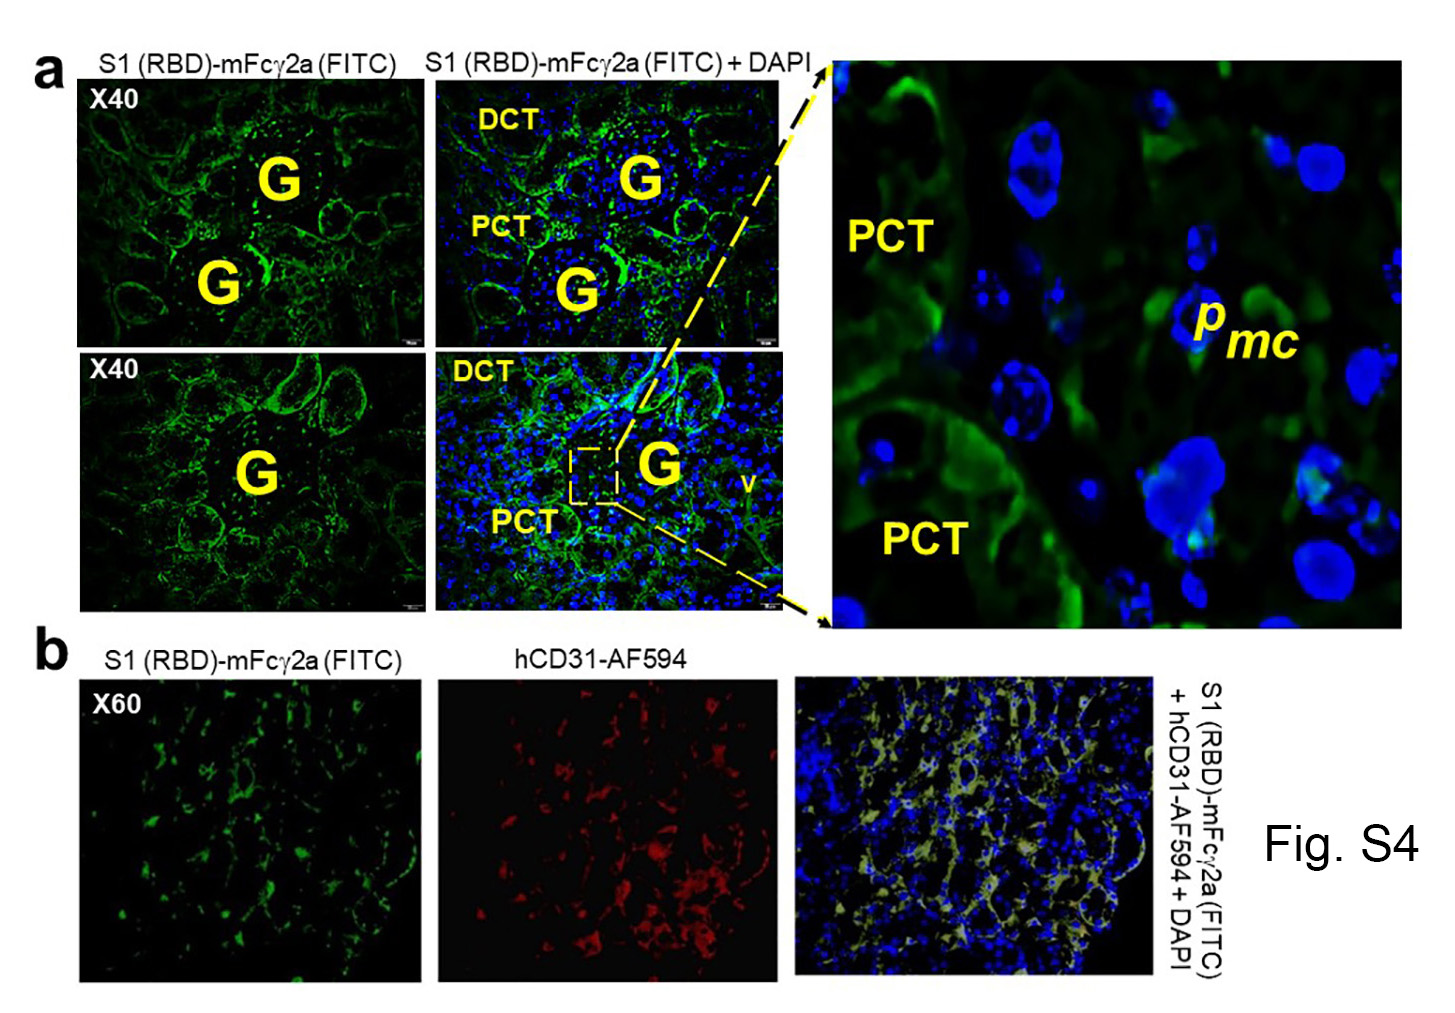


**Figure S4. Binding of SARS-CoV-2 S1 (RBD) protein to kidney epi/endothelia of infected HIS-DRAGA mice. a.** Sections of renal cortex from HIS-DRAGA survivors #F1 (upper panels) and #F2 (lower panels) of SARS-CoV-2 infection with 2.8x104 pfu and 2.8x103 pfu, respectively, at the experimental endpoint (14 dpi). Sections were co-stained with DAPI (blue) and S1(RBD)-mFc2a protein + goat anti-mouse IgG-FITC (green). Shown is the S1(RBD) protein bound to the epithelium layer of proximal convoluted tubules (PCT) and distal convoluted tubules (DCT) surounding the glomeruli (G). Enlargement of a peripheral glomerular area shows nuclei (blue) of podocytes (p) and the endothelia (green) of glomerular microcapilaries (mc) in close proximity to the podocytes (green). **b.** Expression of hACE2 revealed by S1(RBD)-mFc2a binding (green) on kidney epithelial cells labeled with an anti-hCD31-AF594 antibody (red).


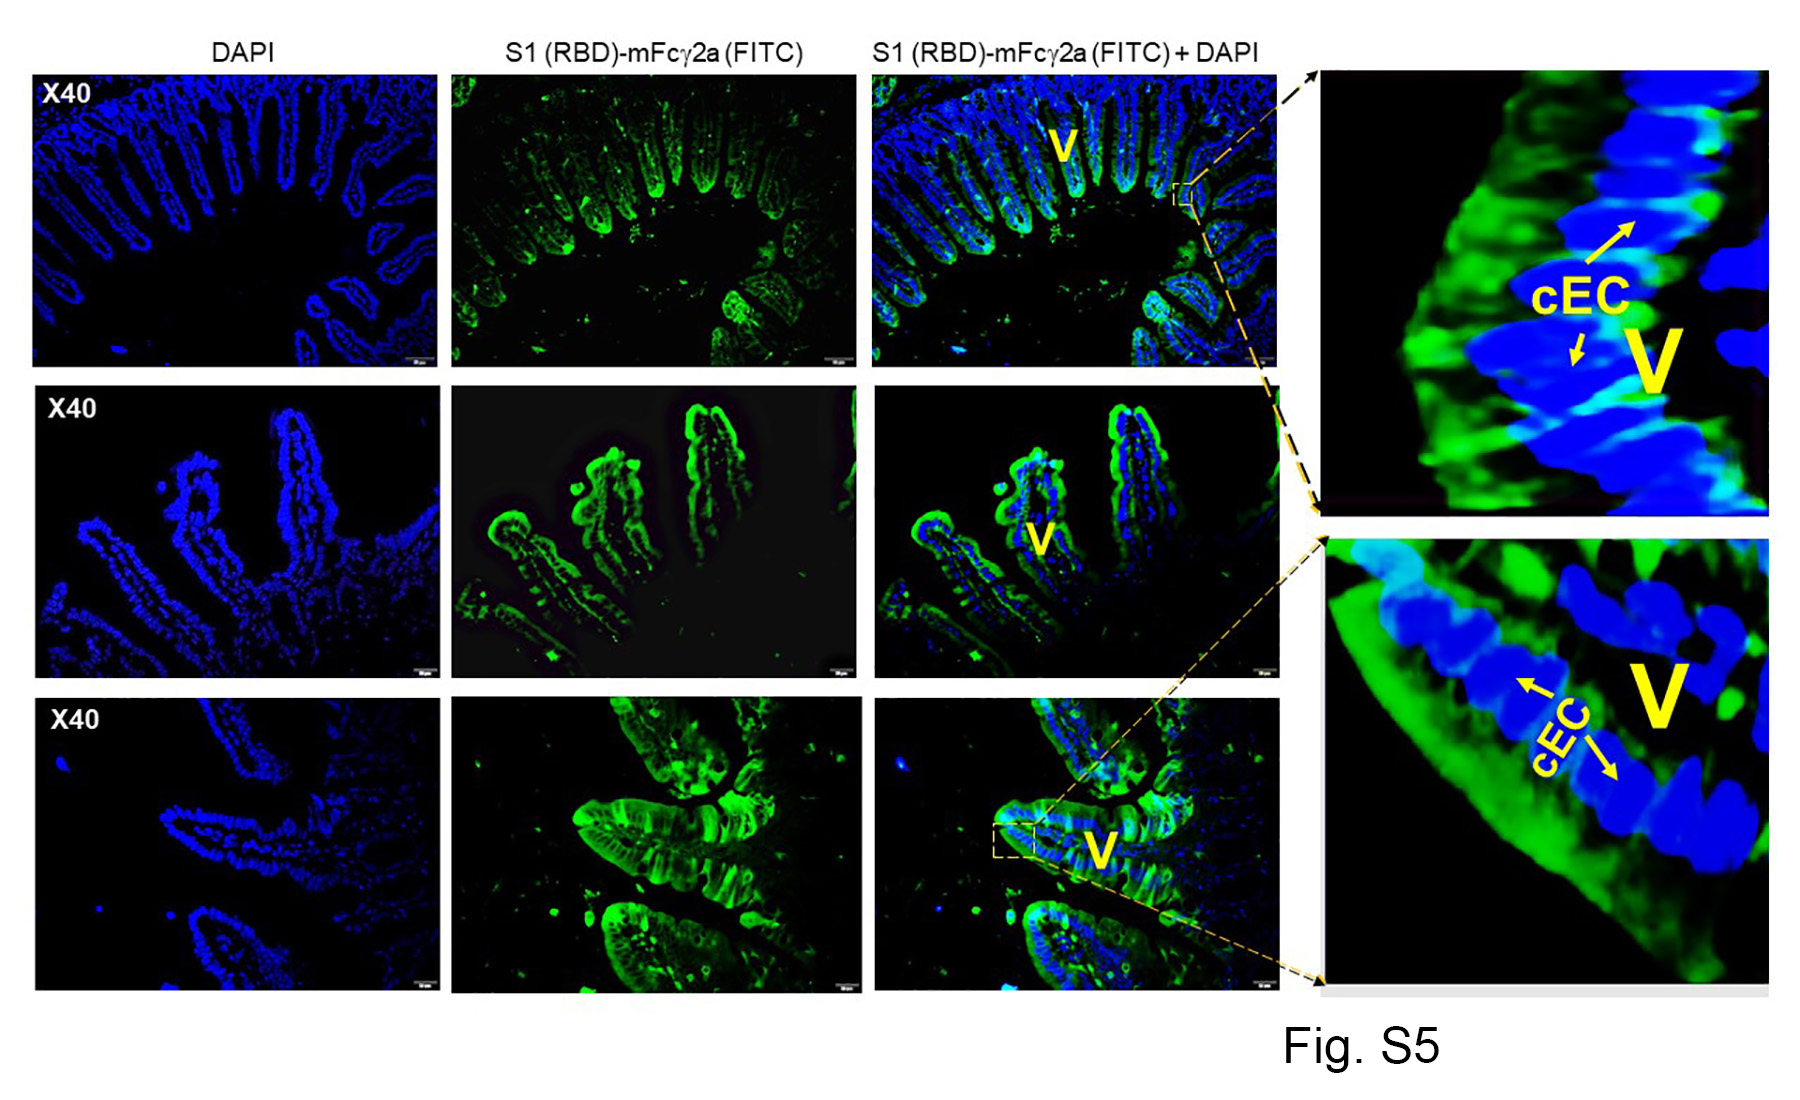


**Figure S5. Binding of SARS-CoV-2 S1(RBD) protein to intestinal epithelia of infected HIS-DRAGA mice.** Tissue sections from the small intestine of HIS-DRAGA mouse #F1 (*upper and middle panels*) and #F2 (*lower panel*) survivors of SARS-CoV-2 infection with 2.8x104 pfu and 2.8x103 pfu, respectively, at the experimental endpoint (14 dpi). Sections were co-stained with DAPI (nuclei, blue) and S1(RBD)-mFc2a protein+ goat anti-mouse IgG-FITC (green). Shown is the S1(RBD) protein bound to the columnar epithelial cells (cEC) of the absorptive intestinal villi (V).


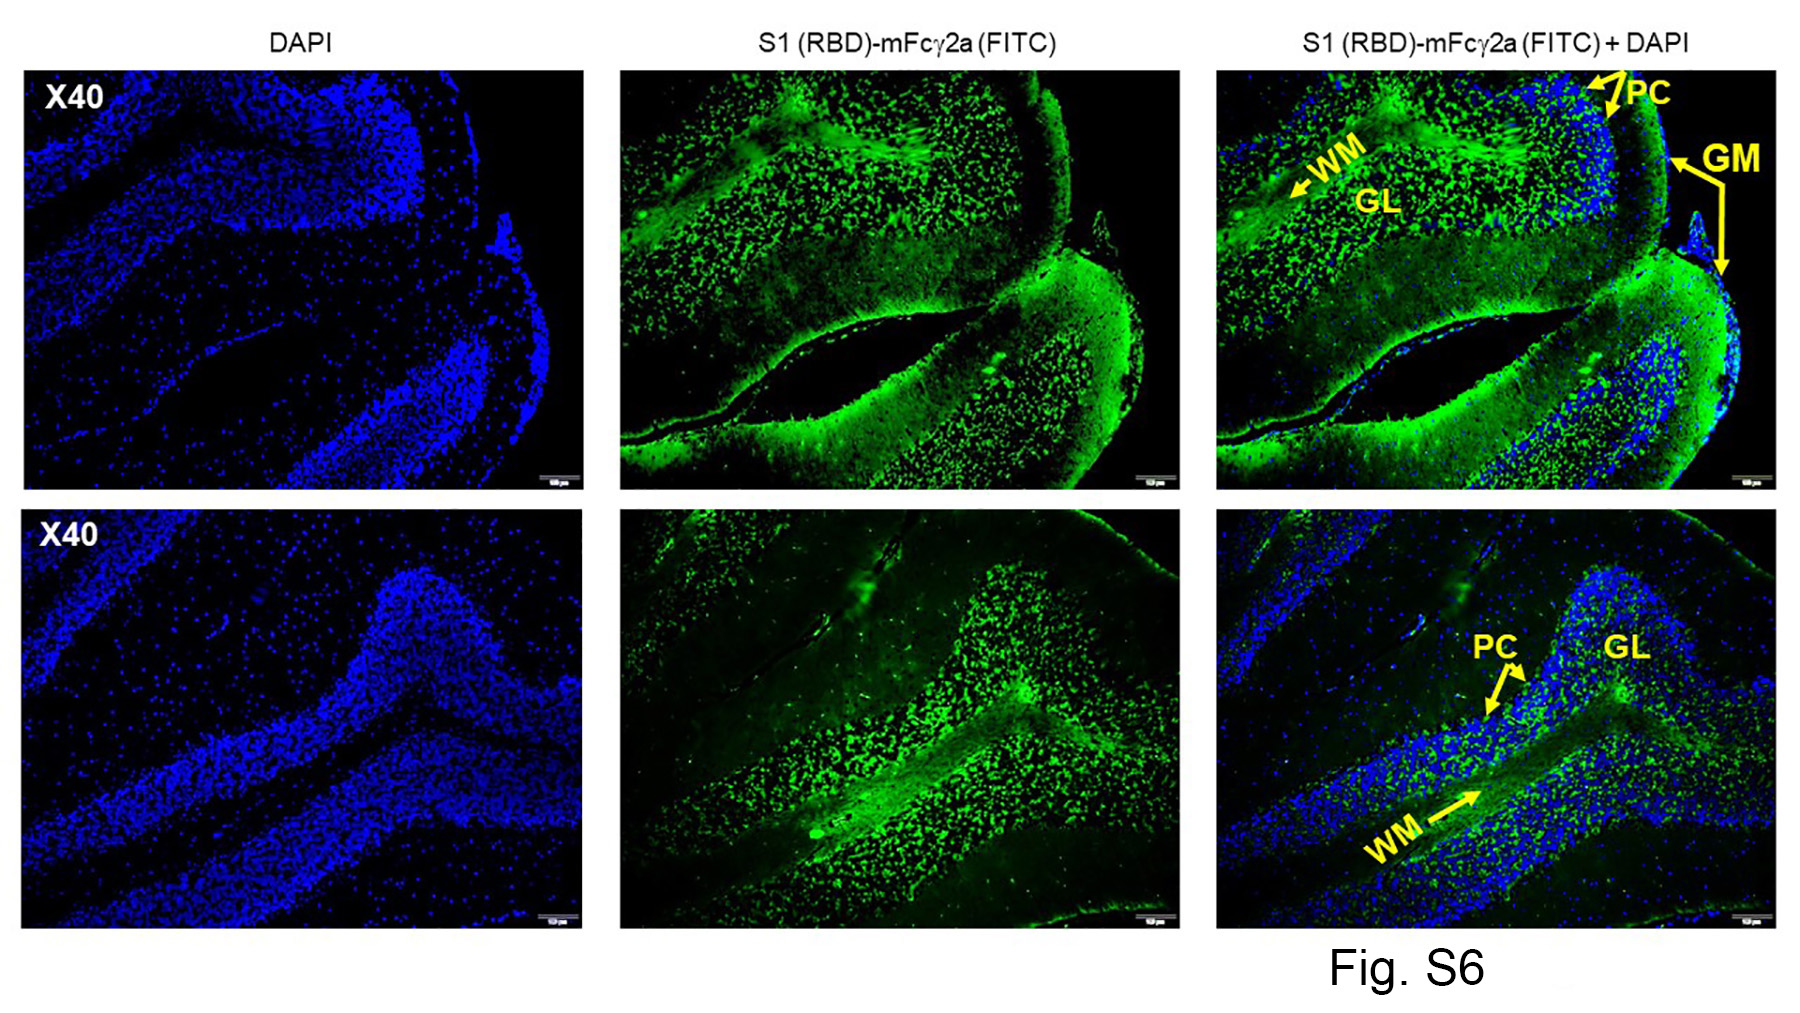


**Figure S6. Binding of SARS-CoV-2 S1(RBD) protein to the brain epithelia in infected HIS-DRAGA mice.** Tissue sections of cerebellum cortex from HIS-DRAGA mice #F1 (*upper panel*) and #F2 (*lower panel*) survivors of SARS-CoV-2 infection with 2.8x104 pfu and 2.8x103 pfu, respectively, at the experimental endpoint (14 dpi) co-stained with DAPI (nuclei, blue) and S1(RBD)-mFc2a protein + goat anti-mouse IgG-FITC (green). Shown is the S1(RBD) protein bound to the white matter (WM), granular layer (GL), and Purkinje cells (PC), but not to the outer neuronal layer in the grey matter (GM).


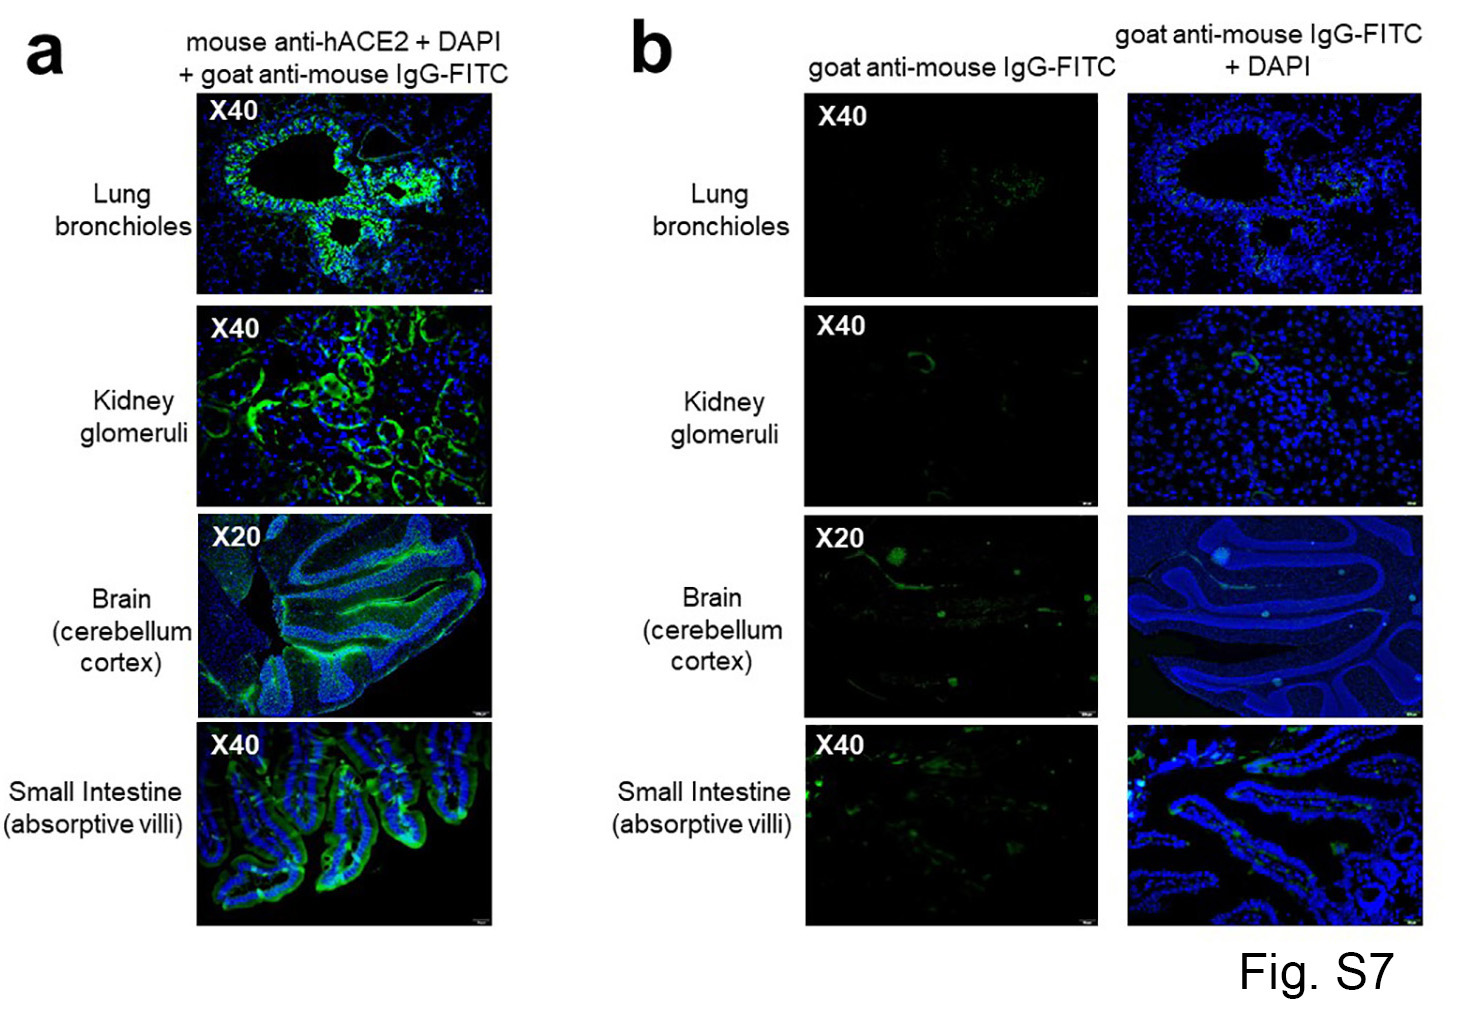


**Figure S7. Identification of hACE2 on tissue sections from organs of a non-infected HIS-DRAGA mouse, detected with an anti-hACE2 specific antibody. a.** Merged images oftissue sections from a representative non-infected HIS-DRAGA mouse stained with mouse anti-hACE2 followed by goat anti-mouse IgG-FITC (green) and DAPI (blue). **b.** Minimal background binding of the secondary antibody (goat anti-mouse IgG-FITC) (left) overlapped with DAPI staining (right) of tissue sections adjacent to those shown in *panel a*.


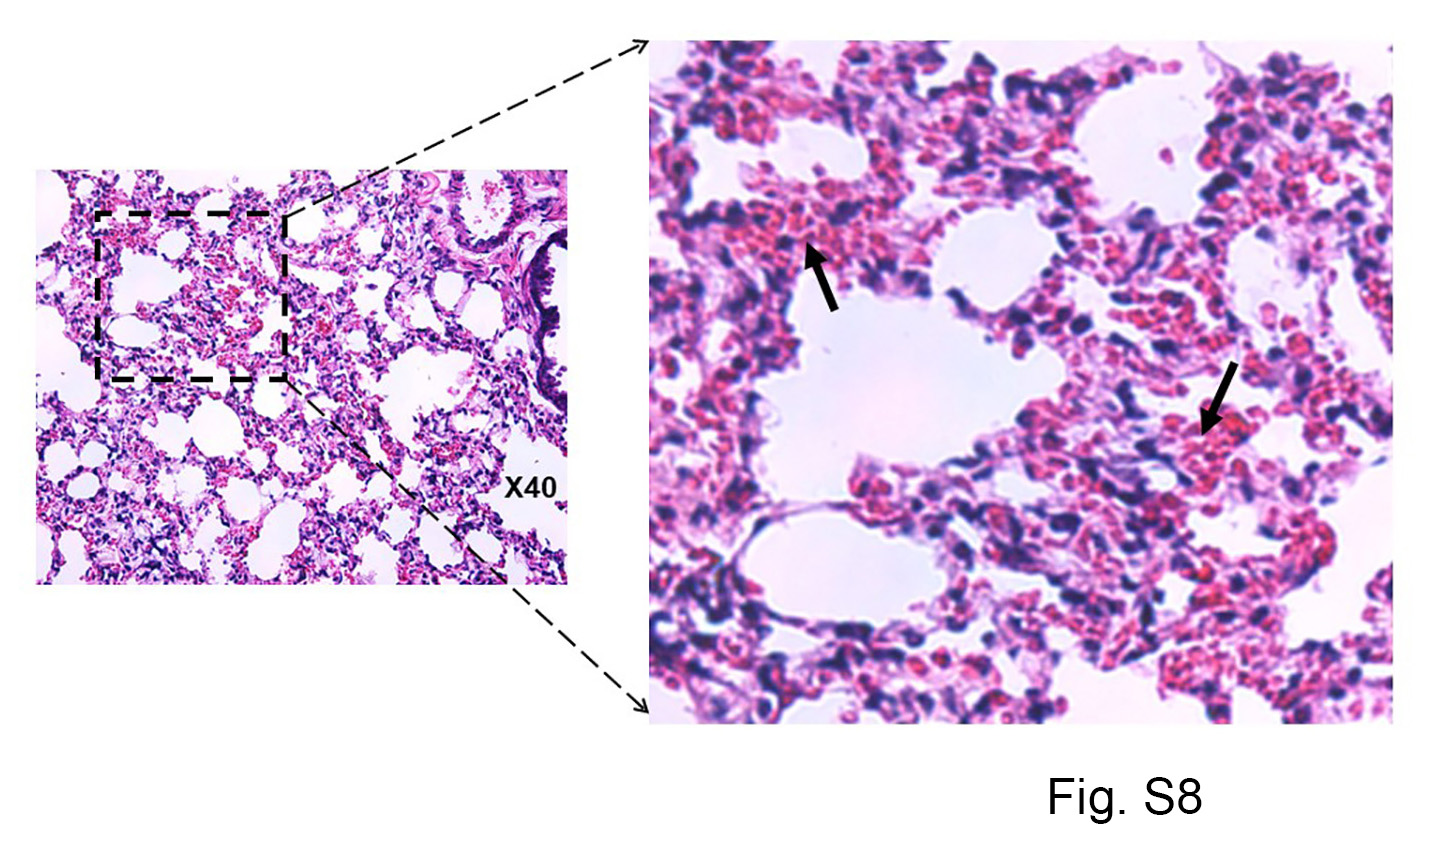


**Figure S8.** **Lung pathology of a HIS-DRAGA mouse recovering from SARS-CoV-2 infection.** Representative H&E-stained lung section from HIS-DRAGA mouse #F2 that recovered its initial body weight at 9 days after infection with SARS-CoV-2 at 2.8x103 pfu. Interstitial and intra-alveolar infiltrates are indicated by arrows.


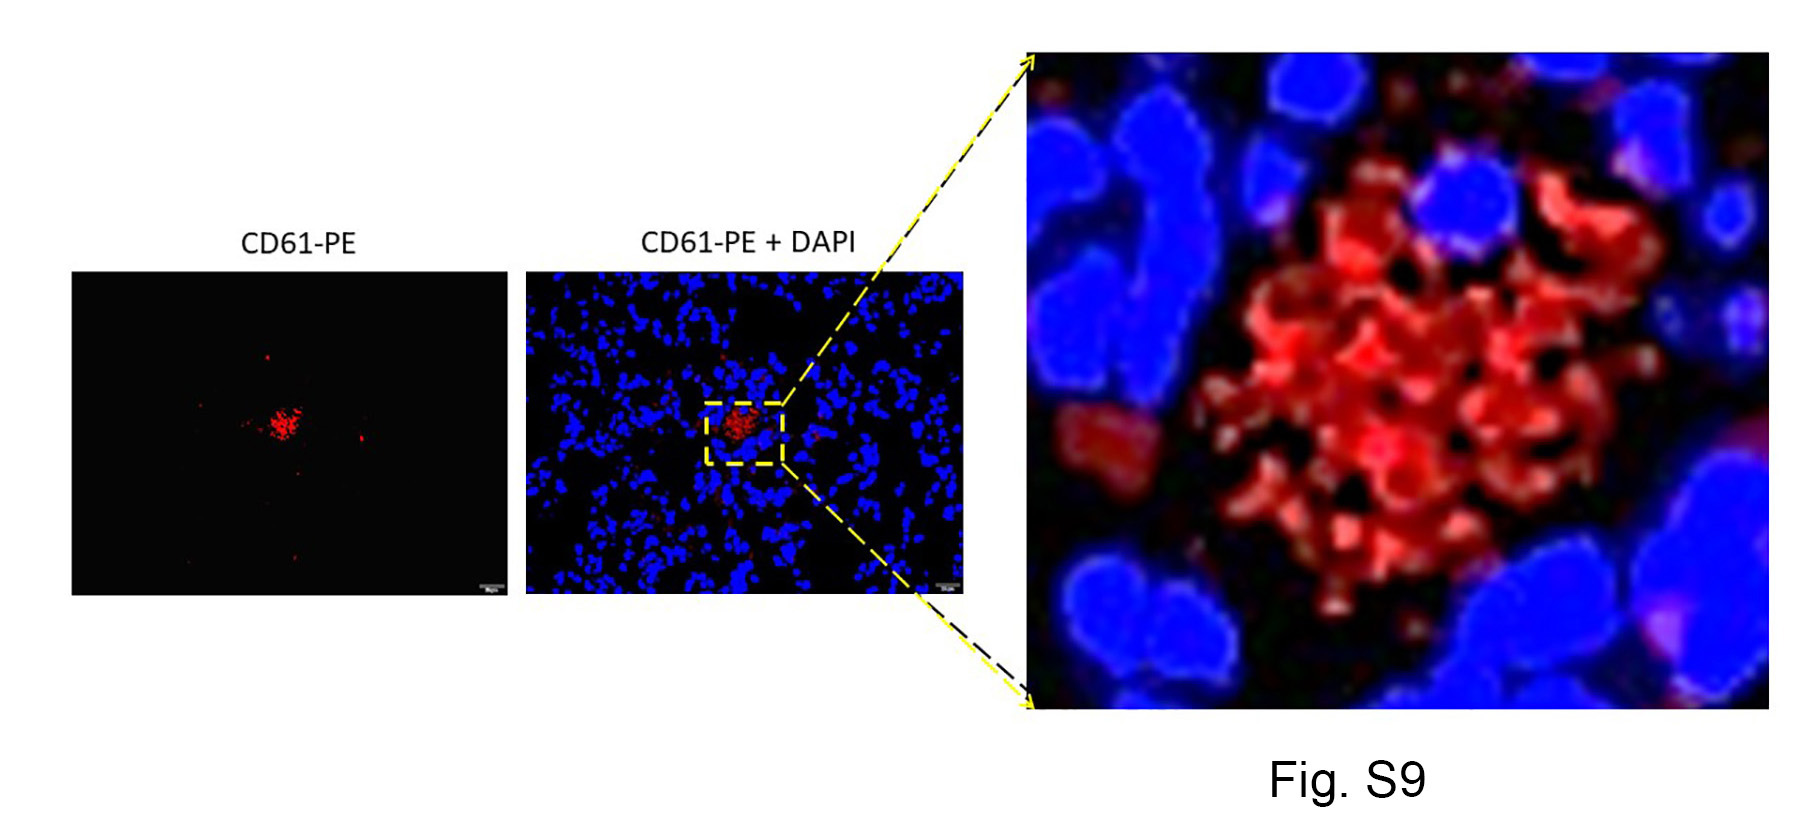


**Figure S9.** **CD61+ intra-alveolar microthrombi in a SARS-CoV-2 infected HIS DRAGA mouse.** Intra-alveolar microthrombi in lung section from a HIS-DRAGA mouse infected with 2.8x104 pfu of SARS-CoV-2, which had not recovered its initial body weight by 14 dpi. *Left panel*, staining with anti-CD61-PE (red). *Right panel* with enlargement: merged anti-CD61-PE co-staining with DAPI (blue). The non-nucleated CD61+ cluster indicates this is a platelet micro-thrombus.


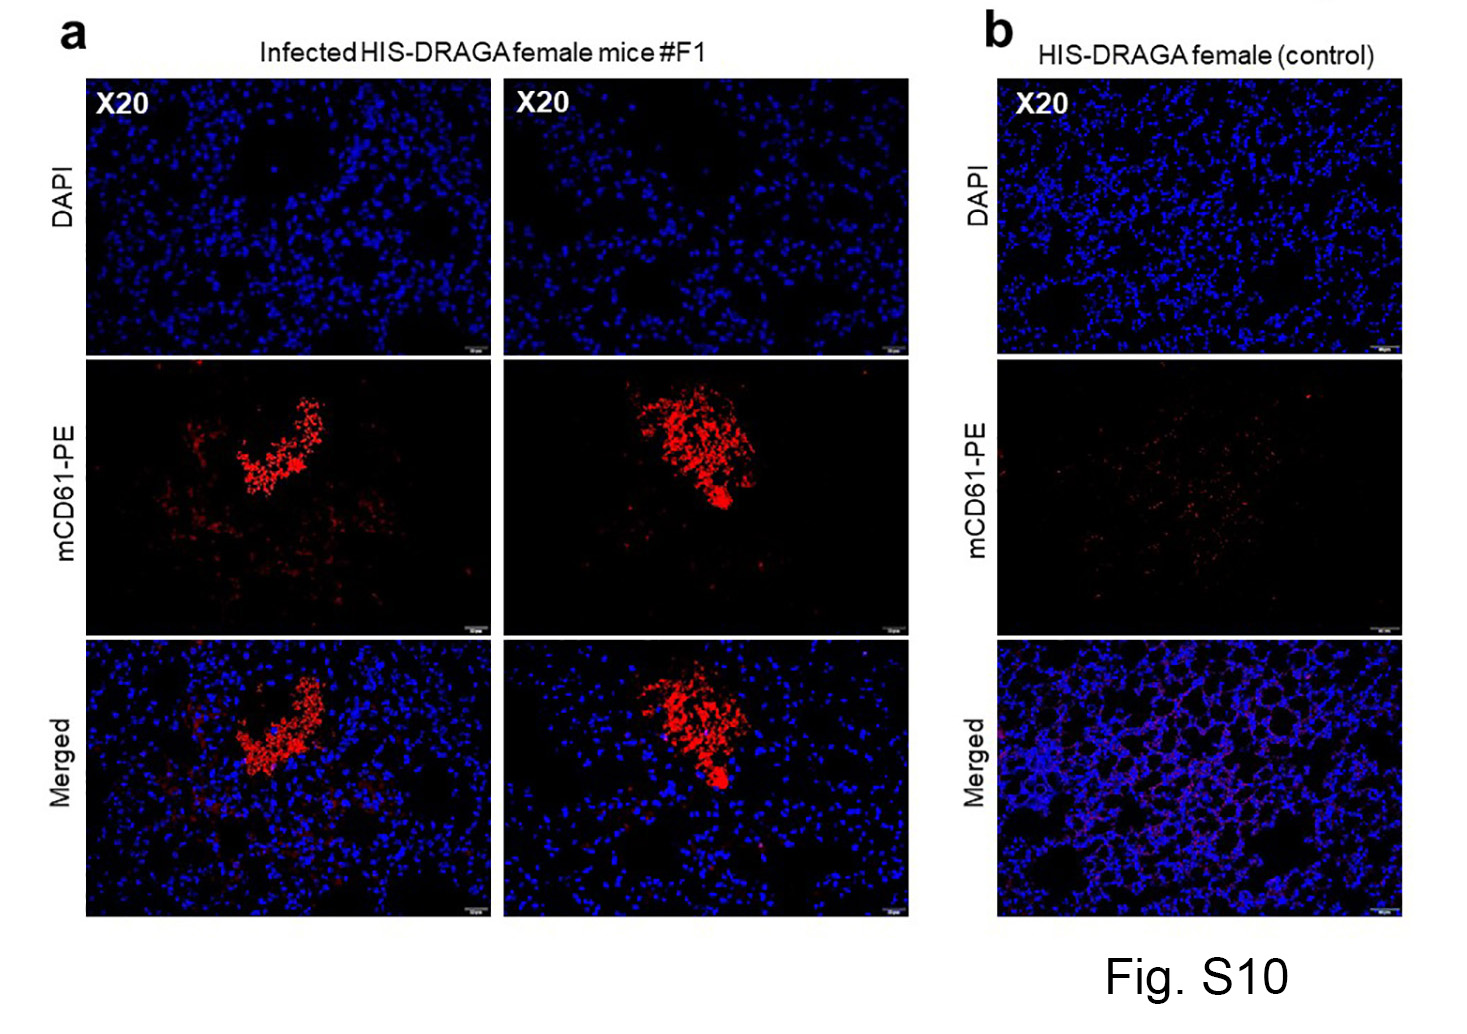


**Figure S10.** **Large intra-alveolar thrombi** **in a SARS-CoV-2 infected HIS-DRAGA mouse.** **a.** Representative lung sectionfrom HIS-DRAGA mouse #F1 infected with 2.8x104 pfu, which had not recovered its initial body weight by 14 dpi. Co-staining with anti-CD61-PE (red) + DAPI (blue). **b.** Representative lung section from a non-infected HIS-DRAGA mouse stained as in panel a, with no evidence of intra-alveolar thrombi.


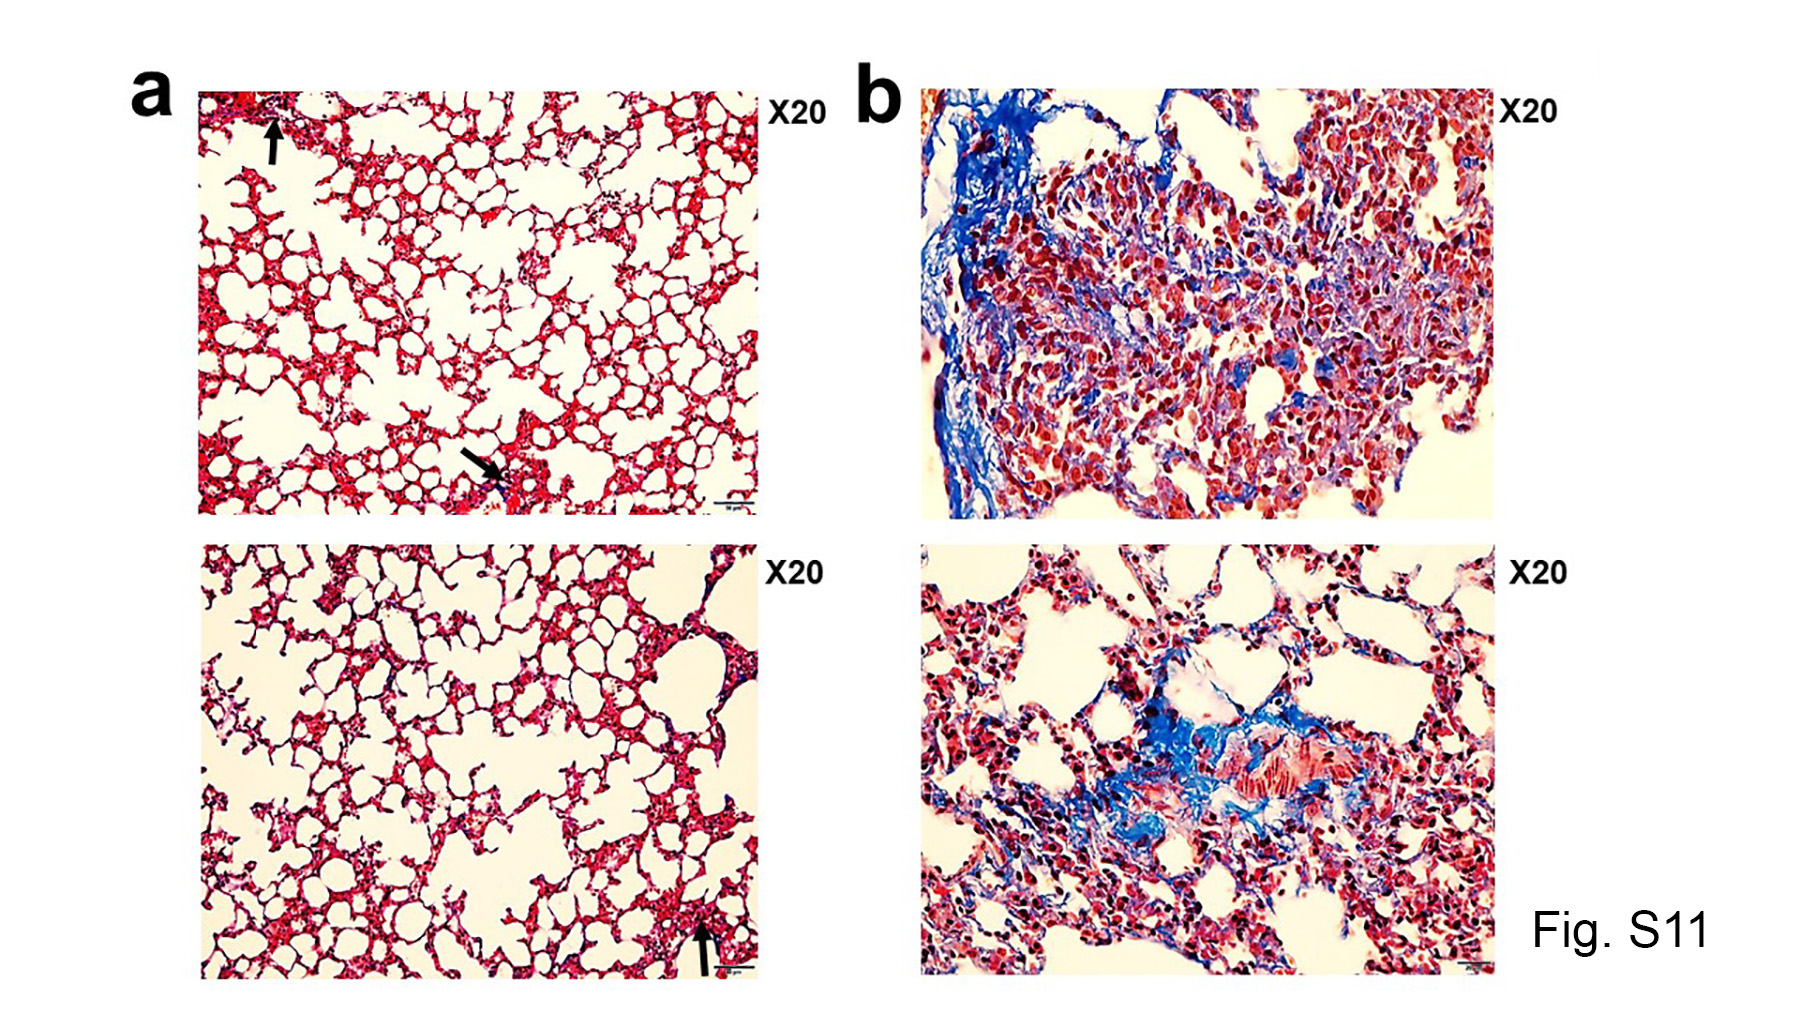


**Figure S11.** **Pulmonary sequelae in SARS-CoV-2 infected DRAGA mice.** a. Masson’s Trichrome staining of lung sections from HIS-DRAGA mice #F3 (upper panel) and #F4 (lower panel) infected with 103 pfu SARS-CoV-2, which recovered their initial body weights by 9 and 25 dpi, respectively. Shown are small peri-alveolar infiltrates building collagen fibers (blue, arrows). **b.** Masson’s Trichrome staining of lung sections from HIS-DRAGA mice #F5 (*upper panel*) and #F6 (*lower panel*) infected with 103 pfu SARS-CoV-2, which had not recovered their initial body weights by 25 dpi. Shown are peri-alveolar and intra-alveolar infiltrated areas building collagen fibers (blue).


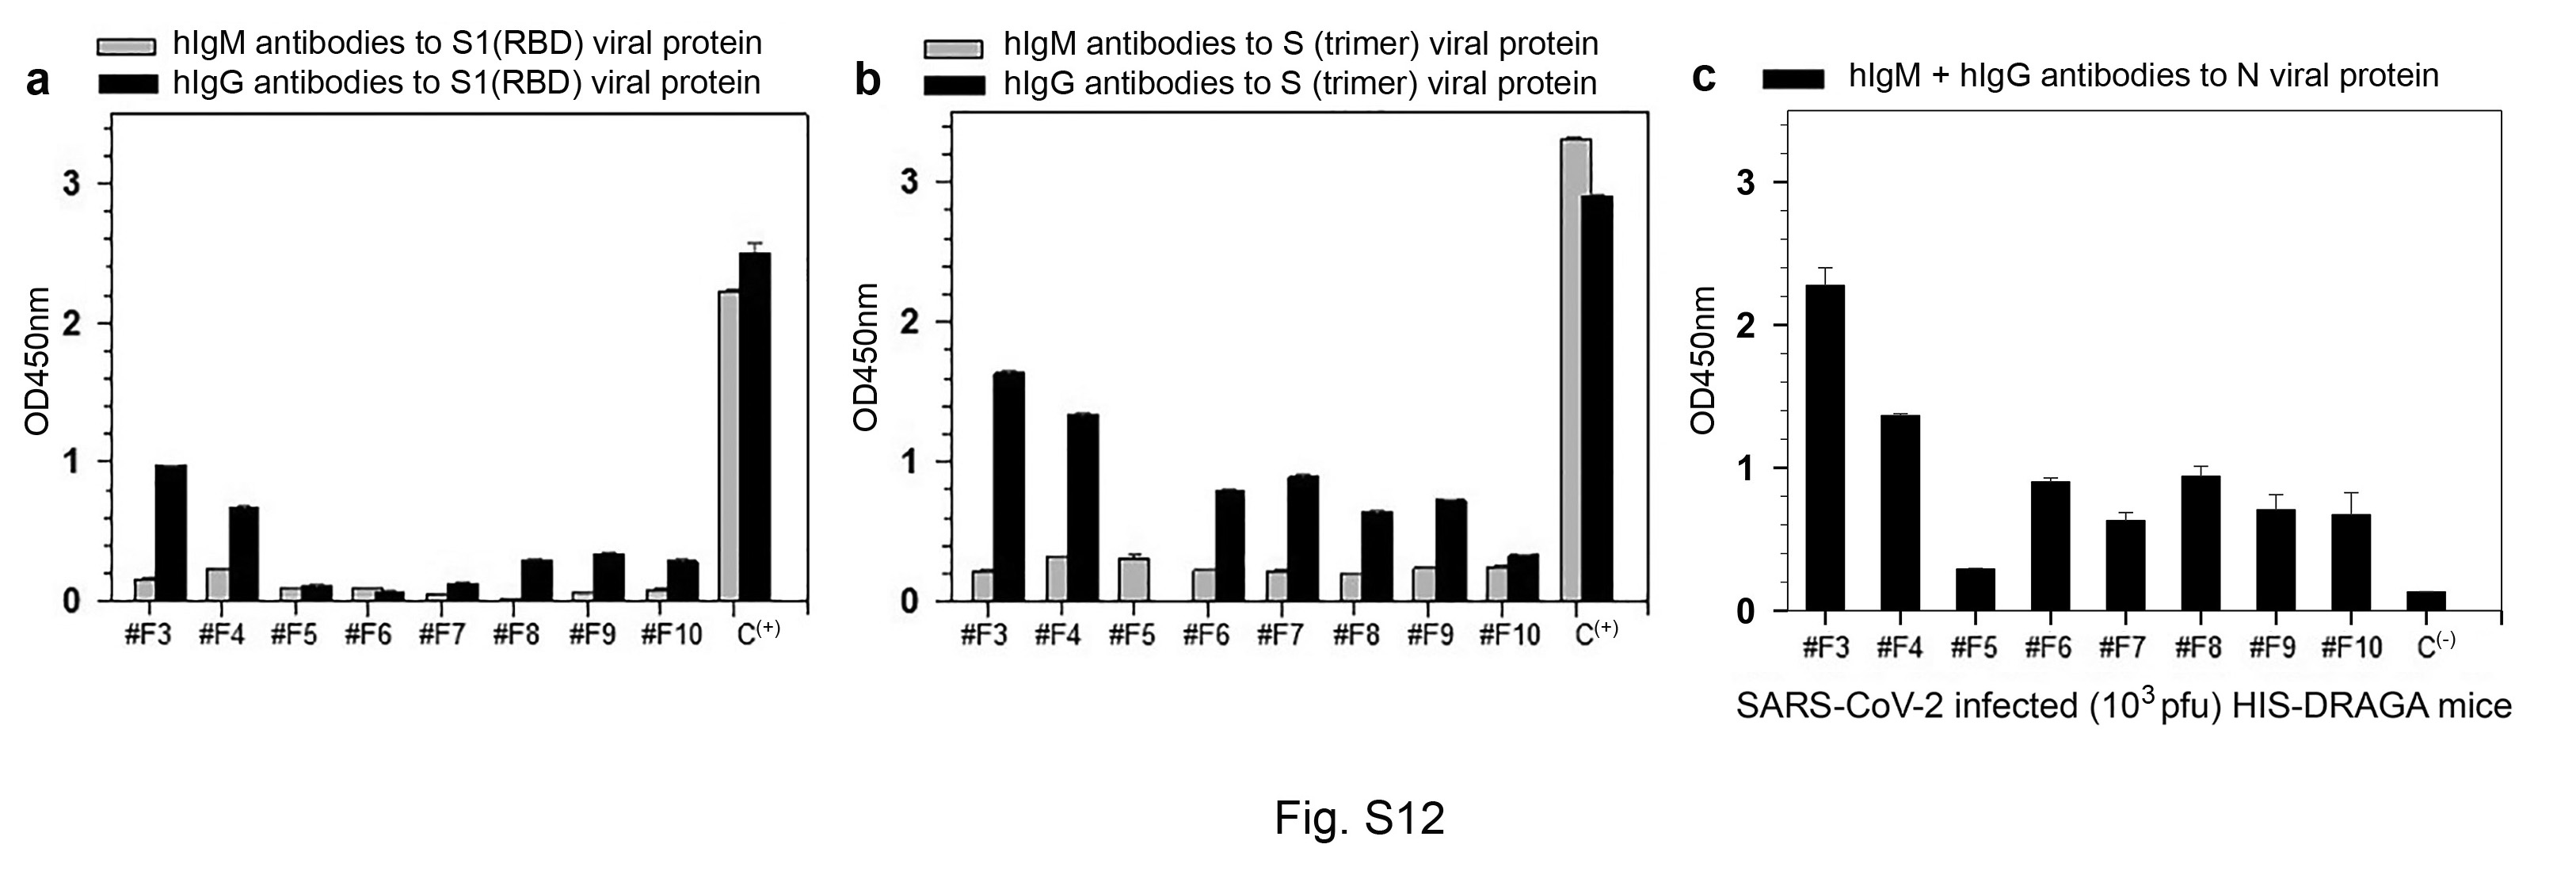


**Figure S12**. **Antibody serum titers to SARS-CoV-2 viral proteins.** Titers of hIgM and hIgG antibodies to S1(RBD) protein (**a**) S-trimer protein (***b***) and N protein (**c)** in sera (diluted 1:20) from 8 HIS-DRAGA mice infected with SARS-CoV-2 (103 pfu), as measured by ELISA at 25 dpi. An anti-S1(RBD) antibody provided in the kit (Bethyl Laboratories) was included as a positive control in panels a and b (C+). The antibody titers against the N protein in serum from a non-infected mouse served as a negative control in panel c. OD450nm values were corrected by subtracting values (ranging from 0.045–0.067) of serum samples from the same mice prior to infection. Standard deviations (+/-SD) for each serum sample in duplicate wells were determined at 99% interval of confidence by SigmaPlot v.14 software.


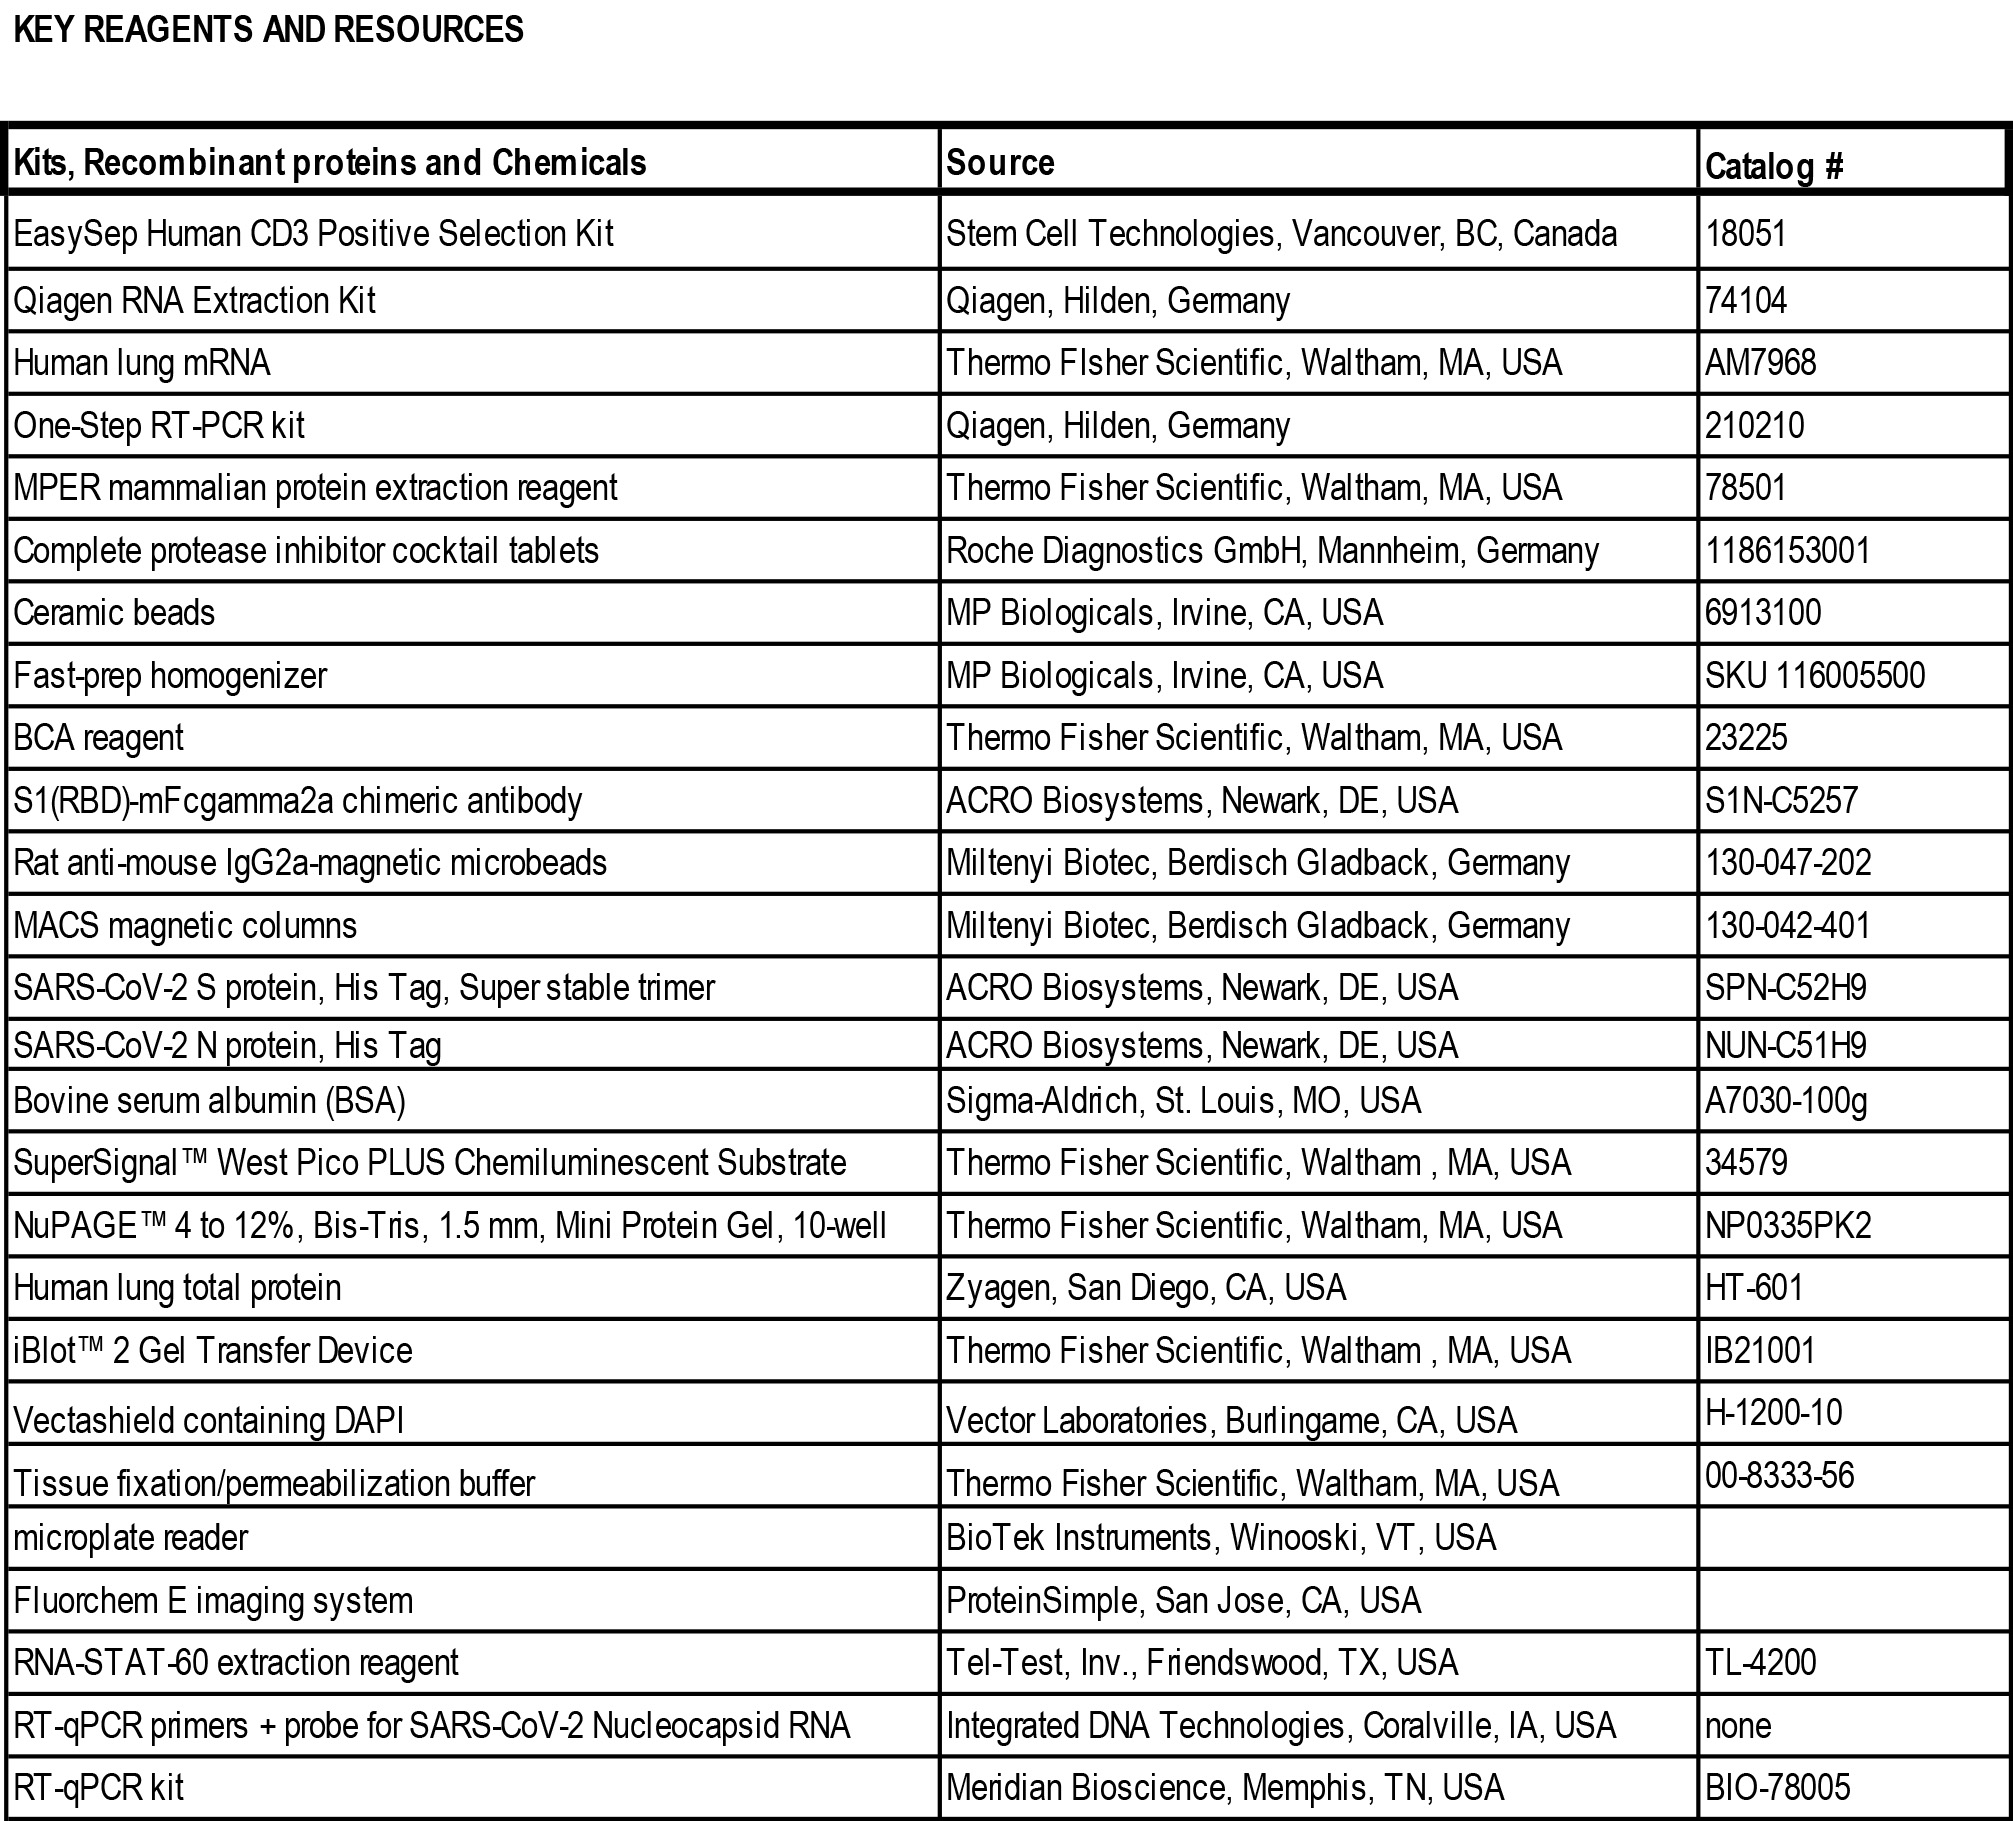


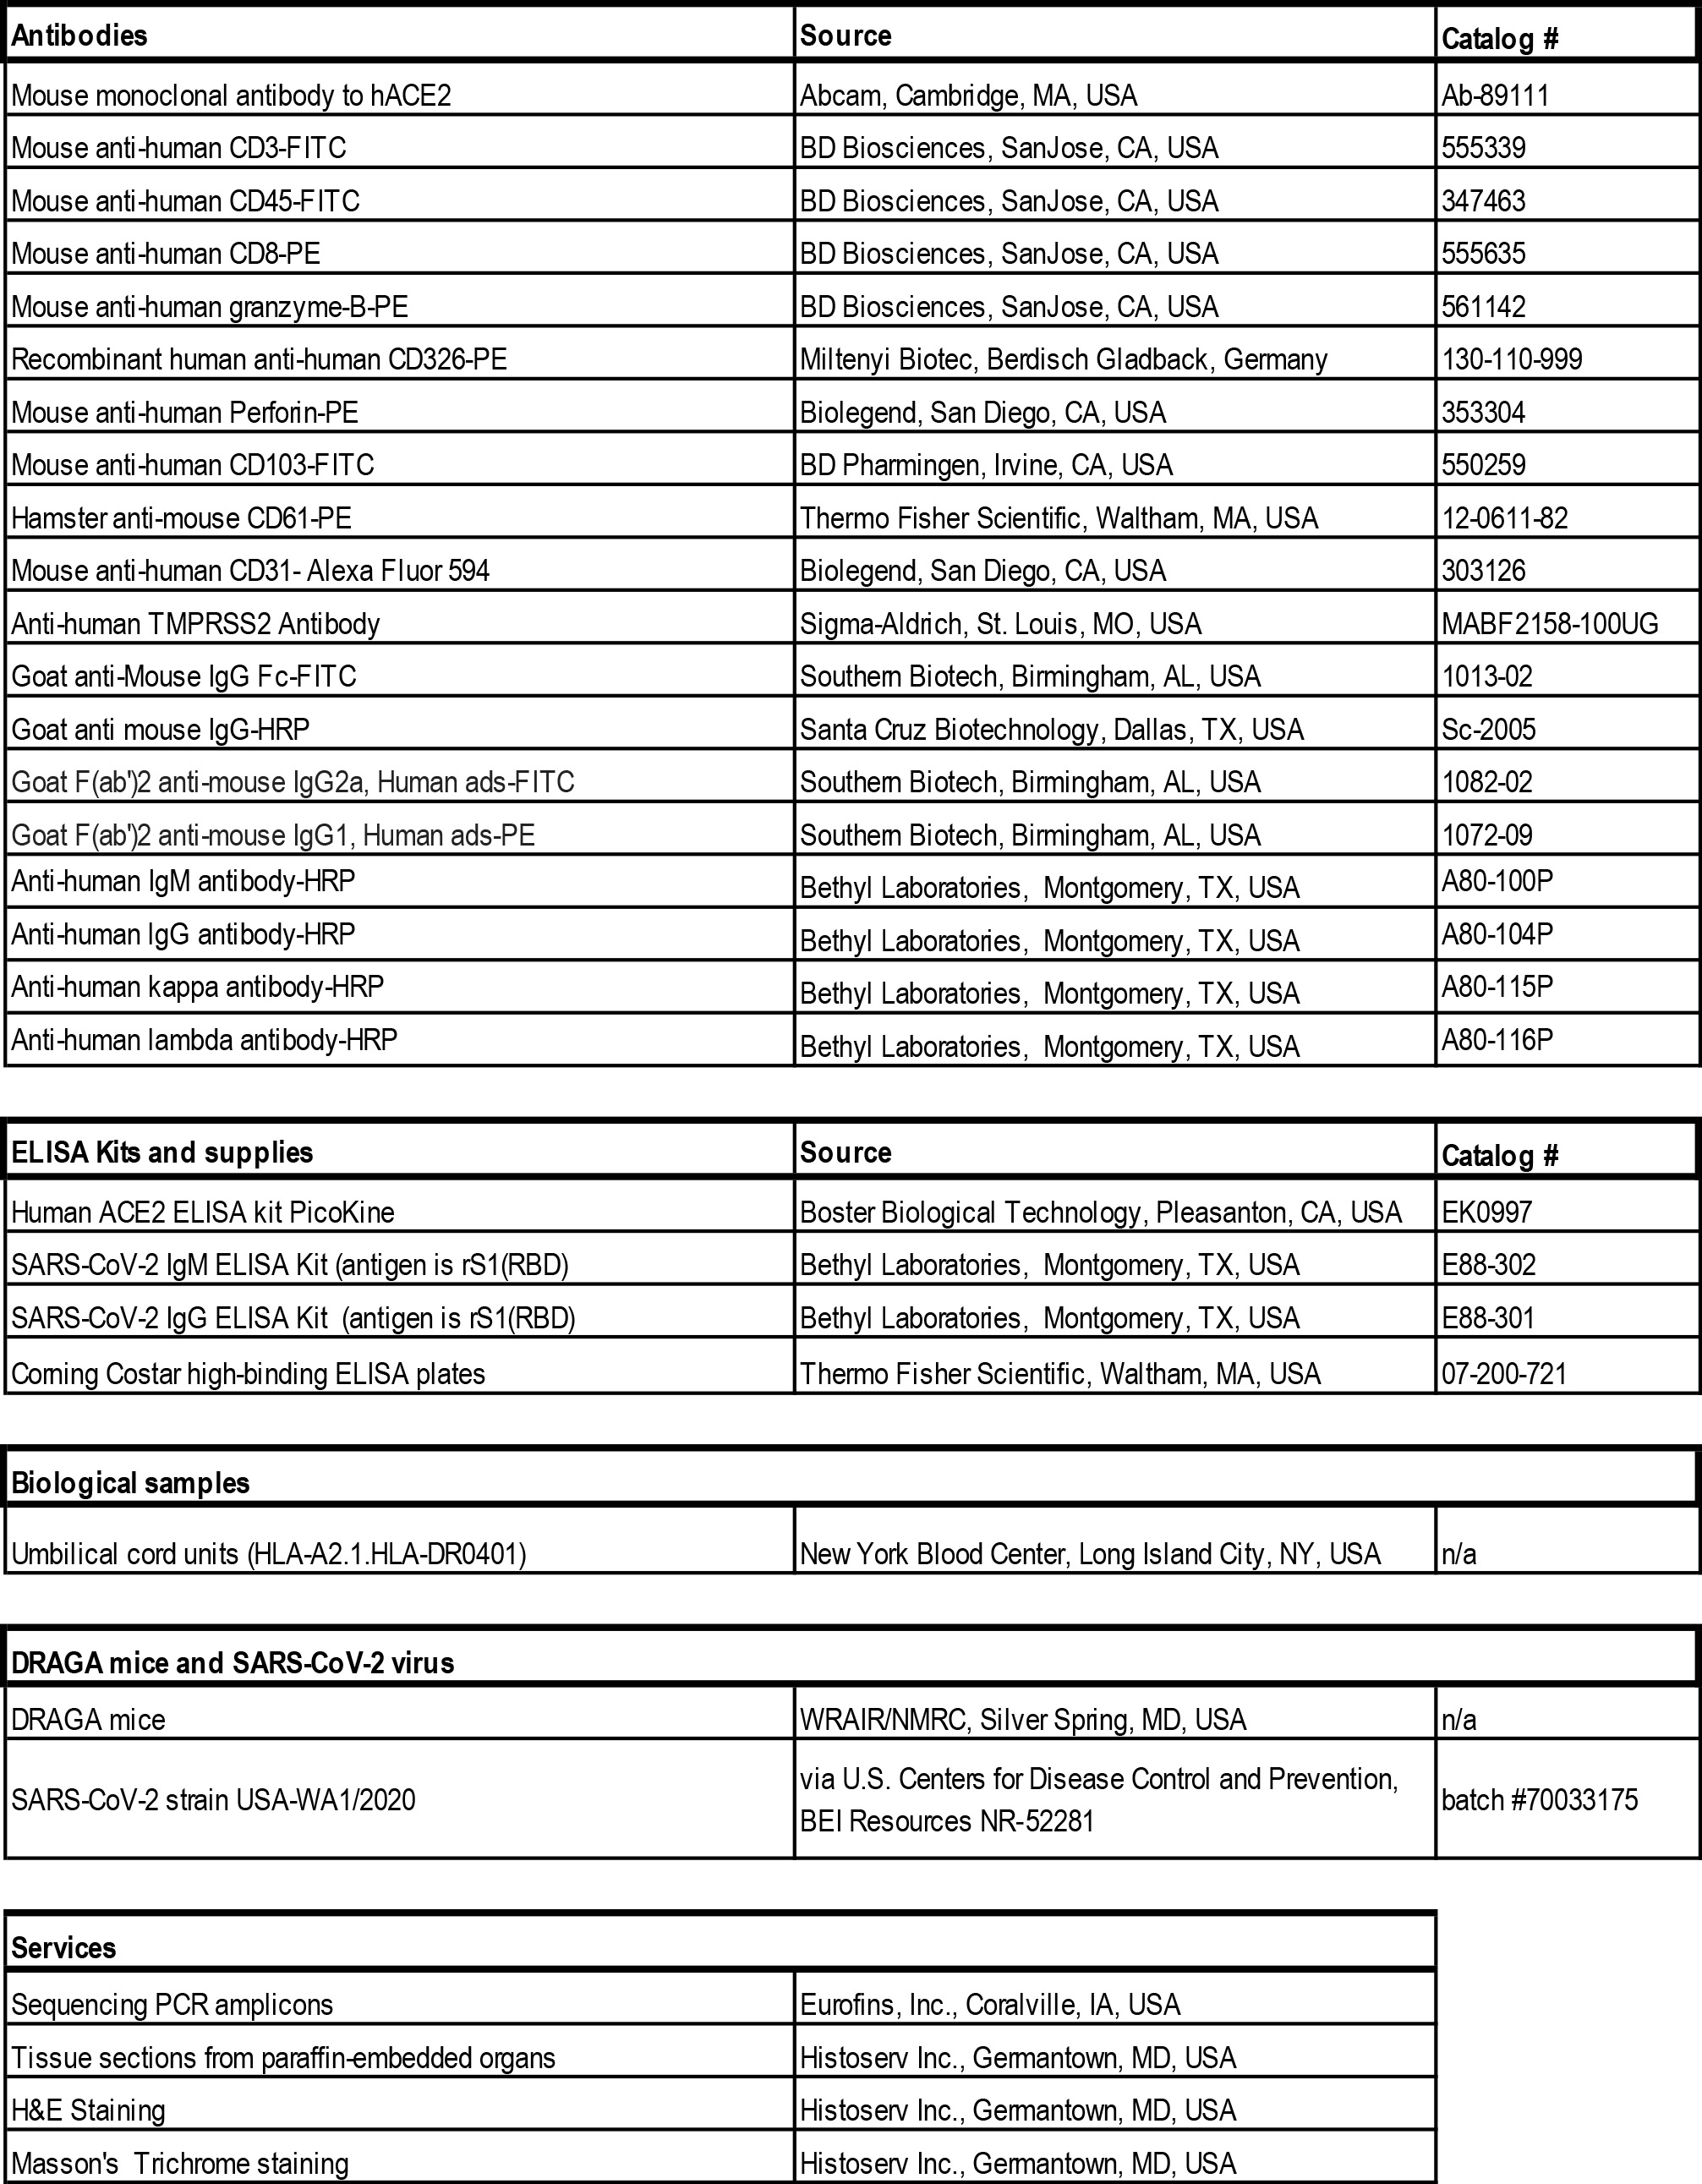

Supplement: Supplementary file 1 [file a185aafb74c441a91457f06d.docx]
